# Supplementary material
Source: PubMed Central journal article supplement (PMC4037931)
Supplement: NIHMS574937-supplement-Supplemental_digital_content_1.pdf [file NIHMS574937-supplement-Supplemental_digital_content_1.pdf]

**Supplemental Digital Content 1, Table that shows individual case characteristics.**

| <b>Controls:</b> | <b>Age of death</b> | <b>PMI</b> | <b>ApoE</b> | <b>Gender</b> | <b>CERAD</b> | <b>BRAAK</b> | <b>Figures</b>  | <b>Brain Region</b> |
|------------------|---------------------|------------|-------------|---------------|--------------|--------------|-----------------|---------------------|
| E04-46           | 40                  | 31         | 3/4         | m             | 0            | II           | Table 1         | Frontal             |
| E05-130          | 52                  | 3          | 3/4         | f             | B*           | 0            | Table 1         | Frontal             |
| E05-184          | 81                  | 20         | 3/3         | m             | A            | II           | Table 1         | Frontal             |
| E05-74           | 59                  | 6          | 2/3         | m             | 0            | 0            | Table 1         | Frontal             |
| E06-113          | 20                  | 4.5        | 4/4         | f             | 0            | 0            | Table 1         | Frontal             |
| E06-114          | 53                  | 6.5        | 4/4         | m             | 0            | II           | Table 1         | Frontal             |
| E06-41           | 57                  | 10         | 3/3         | m             | 0            | II           | Table 1         | Frontal             |
| E06-45           | 46                  | 6.5        | 3/3         | f             | 0            | 0            | Table 1         | Frontal             |
| OS02-270         | 87                  | 20.5       | 3/4         | m             | B            | II           | Table 1, Fig. 1 | Frontal             |
| OS03-394         | 87                  | 5          | 2/3         | f             | C            | III          | Table 1         | Frontal             |
| E05-54           | 64                  | 17         | 4/4         | f             | C            | III          | Table 1         | Frontal             |
| OS00-23          | 68                  | 11         | 3/3         | f             | B*           | 0            | Table 1         | Frontal             |
| OS03-390         | 74                  | 7          | 3/3         | f             | 0            | II           | Table 1         | Frontal             |
| OS03-299         | 69                  | 6          | 3/3         | m             | 0            | II           | Table 1         | Frontal             |

\*sparse NP-parietal cx only

| <b>Sporadic AD:</b> | <b>Age of death</b> | <b>PMI</b> | <b>ApoE</b> | <b>Gender</b> | <b>CERAD</b> | <b>BRAAK</b>      | <b>Age onset</b> | <b>Figures</b>     | <b>Brain Region</b> |
|---------------------|---------------------|------------|-------------|---------------|--------------|-------------------|------------------|--------------------|---------------------|
| E09-155             | 83                  | 5.5        | 3/4         | m             | C            | V                 | 76               | Table 1            | Frontal             |
| E04-76              | 72                  | 30.5       | 4/4         | m             | C            | V/VI              | 65               | Table 1            | Frontal             |
| E05-80              | 83                  | 8.5        | 4/4         | m             | C            | V/VI              | n/a              | Table 1            | Frontal             |
| OS00-14             | 81                  | n/a        | 3/4         | m             | C            | V                 | 80               | Table 1            | Frontal             |
| OS03-298            | 93                  | 22         | 3/3         | f             | C            | V/VI <sup>§</sup> | 84               | Table 1            | Frontal             |
| E04-172             | 87                  | 6          | 3/4         | f             | C            | V/VI <sup>§</sup> | 72               | Table 1            | Frontal             |
| E05-145             | 87                  | 13         | 3/4         | f             | C            | VI                | 74               | Table 1            | Frontal             |
| OS00-10             | 84                  | 9          | 3/4         | m             | C            | IV                | 78               | Table 1            | Frontal             |
| OS00-38             | 92                  | 6          | 3/3         | f             | C            | VI                | 80               | Table 1            | Frontal             |
| OS01-10             | 87                  | 8          | 3/4         | f             | C            | V                 | 79               | Table 1            | Frontal             |
| OS01-11             | 80                  | 5          | 3/4         | f             | C            | VI                | 75               | Table 1            | Frontal             |
| OS01-115            | 77                  | 24         | 3/3         | m             | C            | V/VI              | n/a              | Table 1, Fig 1,3,4 | Frontal             |
| OS01-128            | 91                  | 2.5        | 3/4         | f             | C            | V/VI              | 70               | Table 1            | Frontal             |

|          |    |     |     |   |   |                   |     |         |         |
|----------|----|-----|-----|---|---|-------------------|-----|---------|---------|
| OS02-209 | 85 | 9.5 | 4/4 | f | C | VI                | n/a | Table 1 | Frontal |
| OS02-38  | 79 | 6   | 4/4 | m | C | V/VI <sup>§</sup> | 73  | Table 1 | Frontal |
| OS03-300 | 75 | 12  | 4/4 | f | C | VI                | 60  | Table 1 | Frontal |
| OS99-27  | 83 | 7   | 3/4 | m | C | VI                | 75  | Table 1 | Frontal |

n/a: data not available

<sup>§</sup>prob V

#### **AD Presenilin:**

|          |    |      |     |   |          |    |    |       |         |
|----------|----|------|-----|---|----------|----|----|-------|---------|
| OS10-110 | 47 | 42   | 3/3 | m | C        | VI | 30 | Fig 2 | Frontal |
| UW-24    | 46 | 3.5  | n/a | m | Freq     | VI | 39 | Fig 2 | Frontal |
| UW-238   | 51 | <24  | n/a | f | Freq     | V  | 41 | Fig 2 | Frontal |
| UW-241   | 65 | <24  | n/a | f | Freq     | V  | 47 | Fig 2 | Frontal |
| UW-301   | 37 | 7    | n/a | m | Freq     | VI | 31 | Fig 2 | Frontal |
| UW-304   | 58 | <24  | n/a | m | mod.freq | V  | 48 | Fig 2 | Frontal |
| UW-328   | 44 | 17.5 | n/a | f | freq     | VI | 38 | Fig 2 | Frontal |

#### **AD APP mutation:**

|          |    |     |     |   |   |    |    |       |         |
|----------|----|-----|-----|---|---|----|----|-------|---------|
| OS12-24  | 54 | 5.5 | 3/3 | m | C | VI | 45 | Fig 2 | Frontal |
| UW-16514 | 72 | n/a | n/a | f | C | VI | 62 | Fig 2 | Frontal |

#### **CBD**

|         |    |     |     |   |                |        |    |         |           |
|---------|----|-----|-----|---|----------------|--------|----|---------|-----------|
| OS00-13 | 62 | 5   | 3/3 | m | B <sup>‡</sup> | II/III | 57 | Table 2 | Frontal   |
| OS03-01 | 78 | 6.5 | 3/3 | f | C              | IV     | 75 | Table 2 | Cingulate |
| OS02-73 | 44 | 24  | 3/4 | m | 0              | II/III | 33 | Table 2 | Frontal   |

<sup>‡</sup>sparse NP-frontal cx only

#### **PD/DLB**

|          |    |      |     |   |   |    |    |         |           |
|----------|----|------|-----|---|---|----|----|---------|-----------|
| OS05-81  | 68 | 15.5 | 3/3 | m | 0 | II | 47 | Table 2 | Cingulate |
| OS03-392 | 62 | 19   | 3/3 | f | 0 | 0  | 58 | Table 2 | Cingulate |
| OS07-81  | 69 | 19.5 | 3/3 | m | 0 | II | 61 | Table 2 | Frontal   |

#### **FTD**

|          |    |    |     |   |   |    |    |         |         |
|----------|----|----|-----|---|---|----|----|---------|---------|
| OS05-200 | 71 | 18 | 3/3 | f | 0 | II | 62 | Table 2 | Frontal |
|----------|----|----|-----|---|---|----|----|---------|---------|

|          |    |      |     |   |   |   |    |         |         |
|----------|----|------|-----|---|---|---|----|---------|---------|
| OS04-155 | 64 | 6    | 3/4 | f | 0 | I | 56 | Table 2 | Frontal |
| OS04-125 | 61 | 17.5 | 3/3 | m | 0 | I | 56 | Table 2 | Frontal |

**Proteomics:**

| Control:  | Age of death | PMI  | ApoE | Gender | CERAD | BRAAK |  |            |         |
|-----------|--------------|------|------|--------|-------|-------|--|------------|---------|
| BLSA-1313 | 92           | unk  | 3/3  | f      | 0     | II    |  | Figure 5,6 | Frontal |
| BLSA-1471 | 87           | unk  | 2/3  | m      | 0     | II    |  | Figure 5,6 | Frontal |
| BLSA-1517 | 71           | 16   | 4/4  | f      | A     | II    |  | Figure 5,6 | Frontal |
| BLSA-2027 | 86           | 7    | 2/3  | m      | 0     | IV    |  | Figure 5,6 | Frontal |
| BLSA-2066 | 95           | 17   | 2/3  | m      | 0     | III   |  | Figure 5,6 | Frontal |
| AD        |              |      |      |        |       |       |  |            |         |
| BLSA-1649 | 98           | 20   | 3/3  | m      | C     | IV    |  | Figure 5,6 | Frontal |
| BLSA-1984 | 92           | 19   | n/a  | f      | C     | VI    |  | Figure 5,6 | Frontal |
| BLSA-2004 | 82           | 23   | 2/3  | m      | C     | VI    |  | Figure 5,6 | Frontal |
| BLSA-2028 | 83           | 11   | 3/4  | f      | C     | VI    |  | Figure 5,6 | Frontal |
| BLSA-2032 | 94           | 17.5 | 2/3  | f      | C     | VI    |  | Figure 5,6 | Frontal |
