# Supplementary material
Source: PubMed Central journal article supplement (PMC4037931)
Supplement: NIHMS574937-supplement-Supplemental_digital_content_2.pdf [file NIHMS574937-supplement-Supplemental_digital_content_2.pdf]

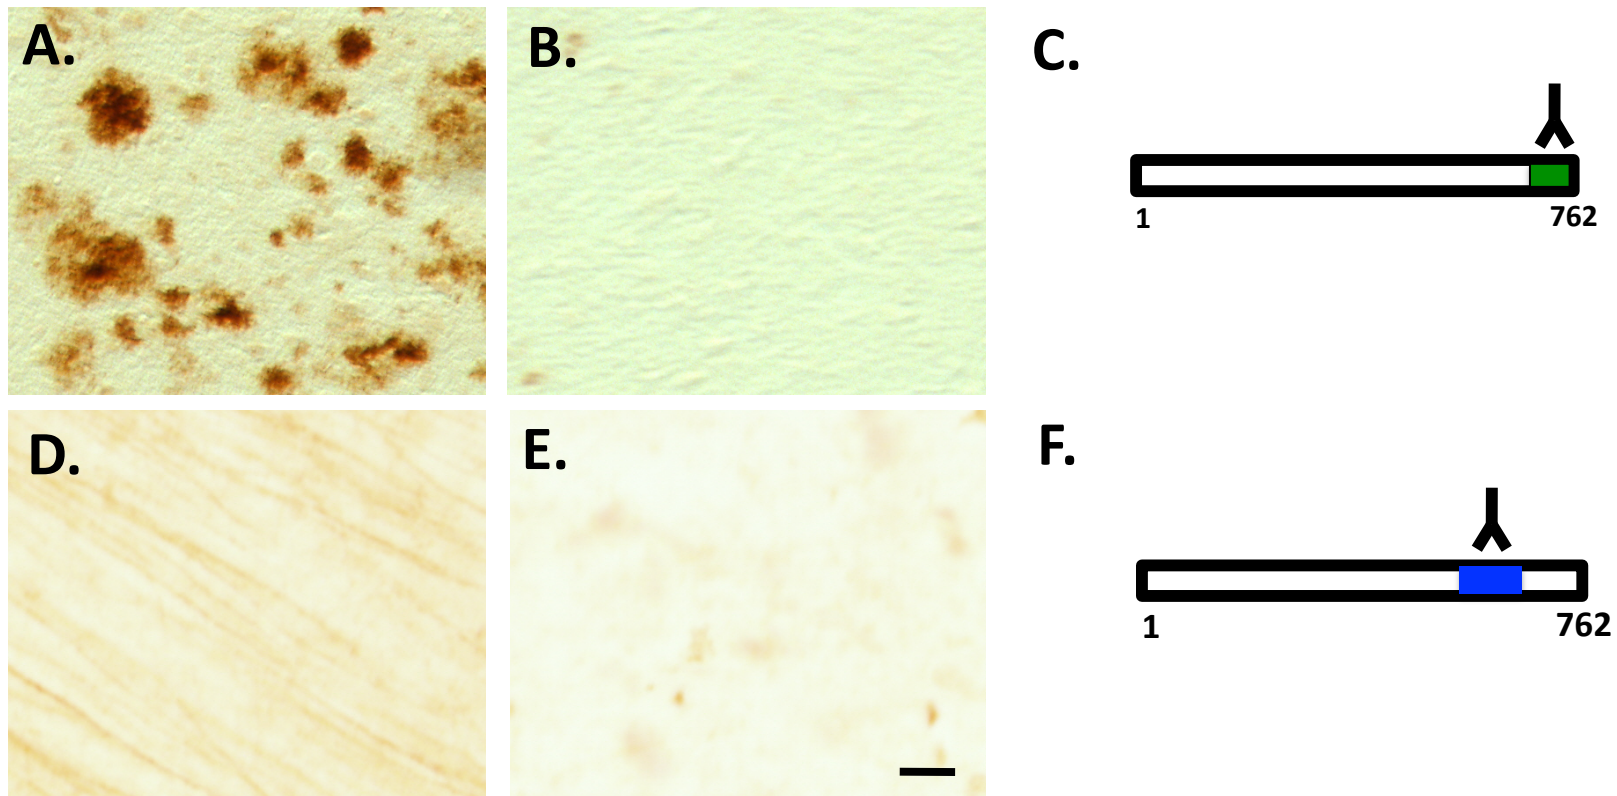

**Supplemental Digital Content 2. Figure that shows antibody preabsorption and antibody epitopes.** Immunohistochemistry of free floating AD frontal cortex with (A) gephyrin antibody 1 and (B) antibody 1 preabsorbed with 5 $\mu$ g/ml of blocking peptide. (C) Antibody 1 carboxy-terminus epitope. Immunohistochemistry of free floating control frontal cortex with (D) gephyrin antibody 2 and (E) antibody 2 preabsorbed with recombinant gephyrin (294-736; 1 $\mu$ g/ml). Nonspecific lipofuscin labeling when recombinant protein was present made it difficult to adequately assess block of antibody 2 in AD cases. (F) Antibody 2 internal epitope. Scale bar is 20 $\mu$ m.
