# Supplementary material
Source: PubMed Central journal article supplement (PMC4037931)
Supplement: NIHMS574937-supplement-Supplemental_digital_content_3.pdf [file NIHMS574937-supplement-Supplemental_digital_content_3.pdf]

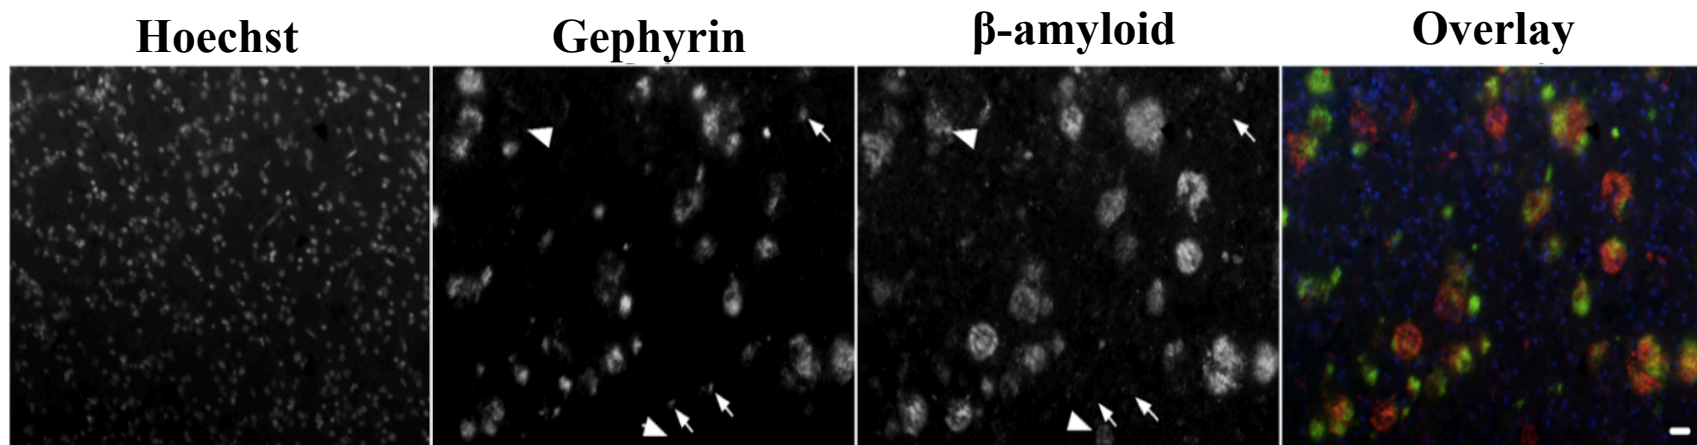

**Supplemental Digital Content 3. Figure that shows non-overlapping gephyrin and β-amyloid plaques.** Immunofluorescence image of hoechst labeled nuclei, FITC-tyramide labeled gephyrin (antibody 1), and cy3 labeled β-amyloid with overlay image combining the 3 images (blue-hoechst, green-gephyrin, red-β-amyloid). This is a maximum intensity reconstruction of a 20μm z-stack acquired on the LSM 510 confocal from a fixed cryopreserved free floating section of AD postmortem tissue. Small arrows indicate gephyrin labeling without β-amyloid colocalization and large arrowhead indicate β-amyloid labeling without gephyrin staining. Scale bar is 40 μm.
