# Supplementary material
Source: PubMed Central journal article supplement (PMC4037931)
Supplement: NIHMS574937-supplement-Supplemental_digital_content_4.pdf [file NIHMS574937-supplement-Supplemental_digital_content_4.pdf]

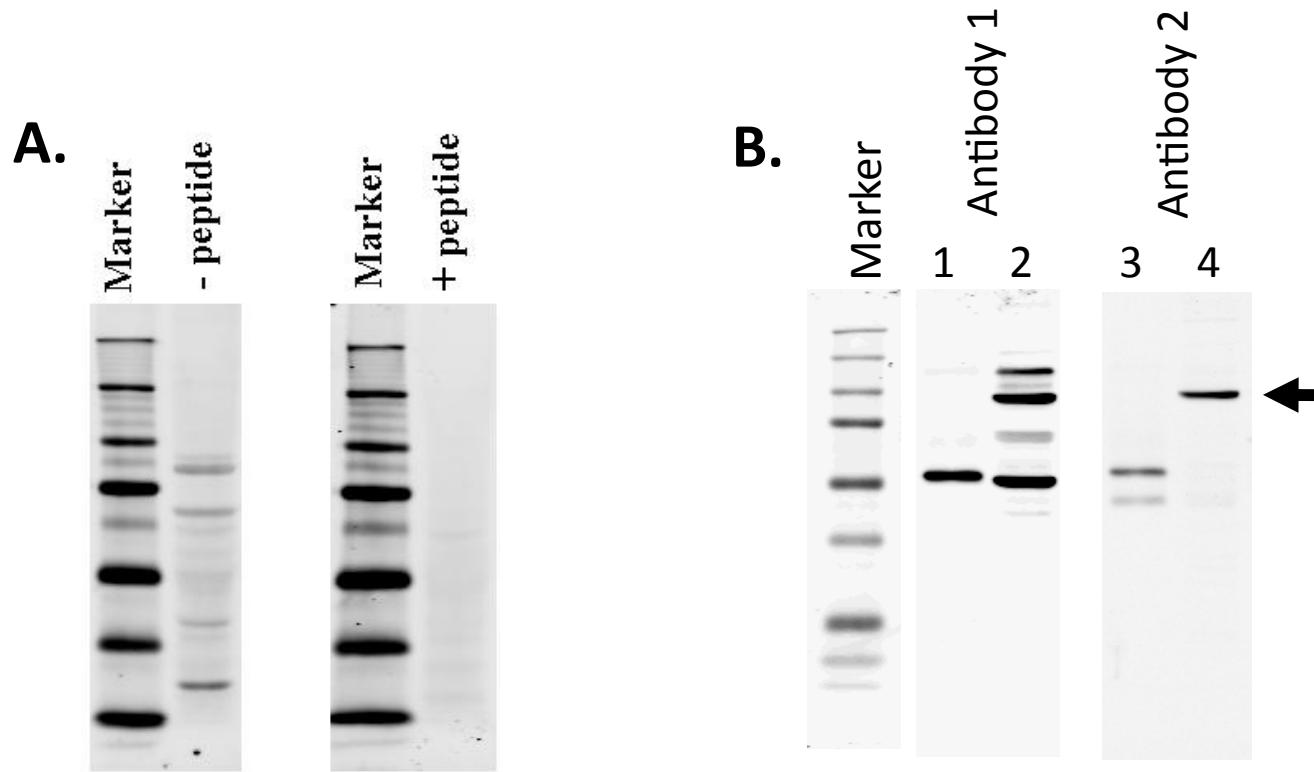

**Supplemental Digital Content 4. Figure that demonstrates antibody specificity on protein blots.** A. 50 $\mu$ g of AD insoluble fraction was resolved on a 10% SDS denaturing gel, transferred to immobilon membrane and blotted for gephyrin (antibody 1) in the absence (left) or presence (right) of immunizing peptide. Peptide was incubated with the antibody for 1 hour prior to probing the blot. B. Antibody 1 (rabbit polyclonal, lanes 1-2) and antibody 2 (mouse monoclonal, lanes 3-4) both label a purified recombinant gephyrin fragment (aa 294-736, lanes 1 and 3) and recombinant full length gephyrin (arrow) transiently over-expressed in human embryonic kidney cells (lanes 2 and 4).
