# Supplementary material
Source: PubMed Central journal article supplement (PMC4037931)
Supplement: NIHMS574937-supplement-Supplemental_digital_content_5.pdf [file NIHMS574937-supplement-Supplemental_digital_content_5.pdf]

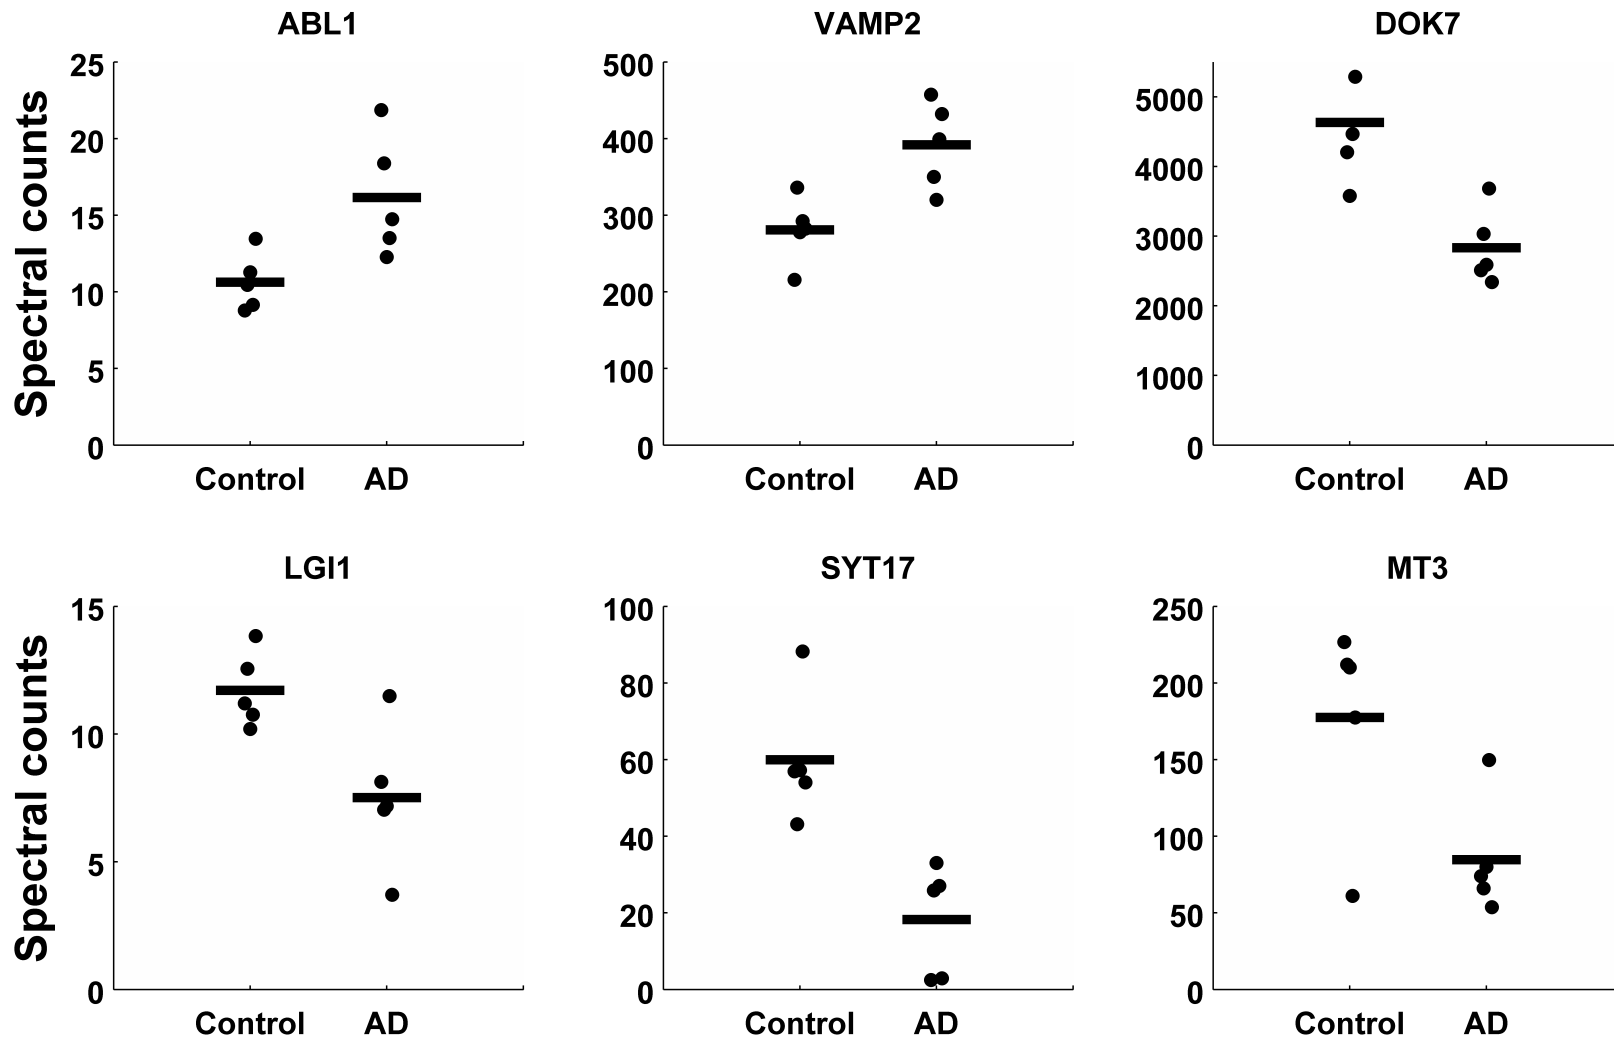

**Supplemental Digital Content 5. Figure that shows other synaptic proteins with significant changes in the AD insoluble fractions.** In addition to gephyrin, 6 other synaptic proteins out of 154 total synaptic proteins identified (based on cross-referencing the COTERM\_CC\_FAT ontology 'synapse') demonstrated significant ( $p < 0.05$ ) increase (abl interactor 1 (ABL1), vesicle-associated membrane protein 2 (VAMP2)) or decrease (protein Dok-7 isoform 1 (DOK7), leucine-rich glioma-inactivated protein 1 precursor (LGI1), synaptotagmin-17 (SYT17), metallothionein-3 (MT3)) in the AD insoluble proteome.
